# Supplementary material for: Optimization of Transmission X-ray Target for Intense Pulsed Electron Beam Accelerators
Source: MDPI journal article supplement (doi:10.3390/app12094327), 2022-04-25
Supplement: s1 [file s1]

# Optimization of Transmission X-ray Target for Intense Pulsed Electron Beam Accelerators

Xiao Yu <sup>1</sup>, Shijian Zhang <sup>2,3,4,5</sup>, Ivan Sergeevich Egorov <sup>5</sup>, Jiangqi Zhao <sup>2,3,4</sup>, Chang Xiong <sup>2,3,4</sup>, Sha Yan <sup>1</sup>, Chang Tan <sup>6</sup>, Gennady Efimovich Remnev <sup>2,5</sup>, Xiaoyun Le <sup>2,3,4 \*</sup>

<sup>1</sup> State Key Laboratory of Nuclear Physics and Technology, Institute of Heavy Ion Physics, Peking University, Beijing 100871, PR China; [yurii@pku.edu.cn](mailto:yurii@pku.edu.cn); [changxiong@buaa.edu.cn](mailto:changxiong@buaa.edu.cn);

<sup>2</sup> School of Physics, Beihang University, Beijing 100191, PR China; [zhangsj@buaa.edu.cn](mailto:zhangsj@buaa.edu.cn); [17377364@buaa.edu.cn](mailto:17377364@buaa.edu.cn); [changxiong@buaa.edu.cn](mailto:changxiong@buaa.edu.cn);

<sup>3</sup> Beijing Advanced Innovation Center for Big Data-Based Precision Medicine, School of Medicine and Engineering, Beihang University, Key Laboratory of Big Data-Based Precision Medicine (Beihang University), Ministry of Industry and Information Technology, Beijing, 100191, PR China;

<sup>4</sup> Beijing Key Laboratory of Advanced Nuclear Energy Materials and Physics, Beihang University, Beijing 100191, PR China;

<sup>5</sup> National Research Tomsk Polytechnic University, Tomsk 634050, Russia; [egoris@tpu.ru](mailto:egoris@tpu.ru); [remnev06@mail.ru](mailto:remnev06@mail.ru);

<sup>6</sup> Shaanxi Key Laboratory of Plasma Physics and Applied Technology, Xi'an Aerospace Propulsion Institute, Xi'an 710100, PR China; [casc\\_tan@163.com](mailto:casc_tan@163.com);

\* Correspondence: [xyle@buaa.edu.cn](mailto:xyle@buaa.edu.cn);

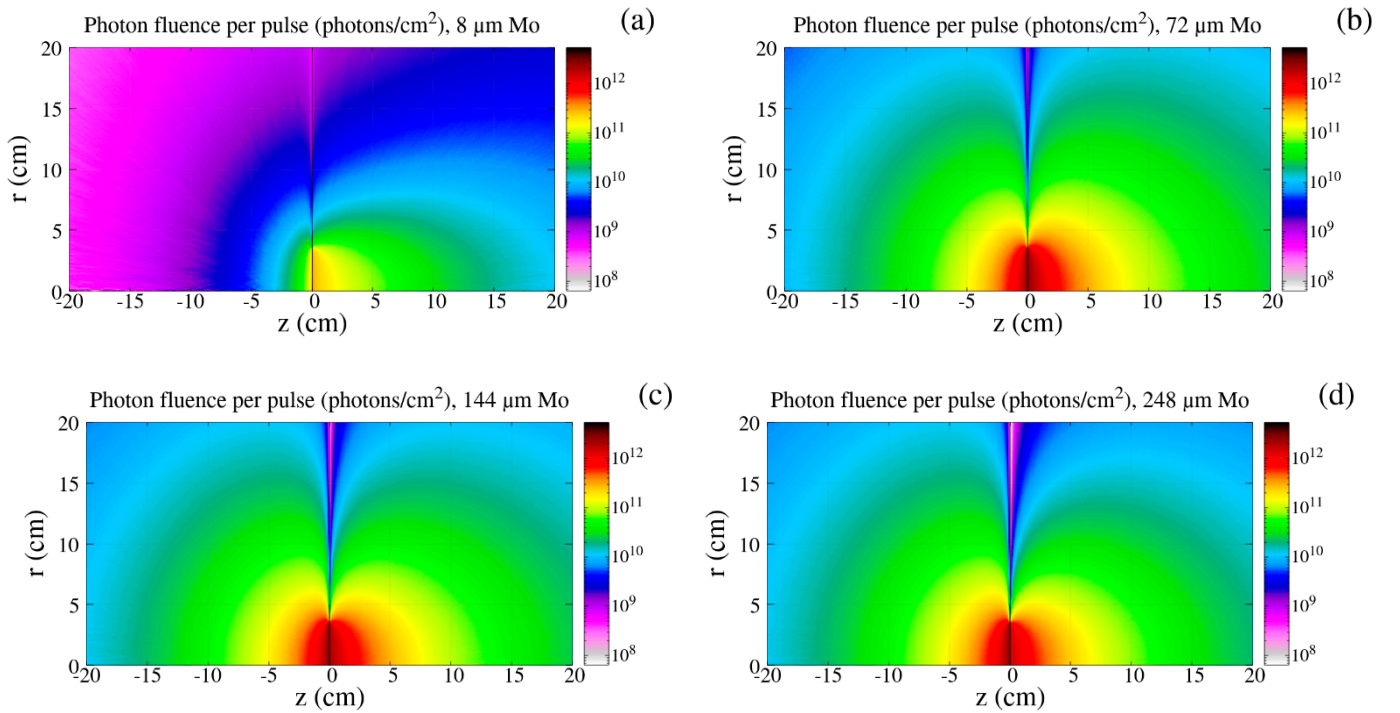

**Figure S1.** Spatial distribution of photon fluence by per IPEB pulse on molybdenum target with thickness of (a) 8  $\mu\text{m}$ , (b) 72  $\mu\text{m}$  (the optimal target thickness), (c) 144  $\mu\text{m}$  (2 times of the optimal target thickness), (d) 248  $\mu\text{m}$  (CSDA range).

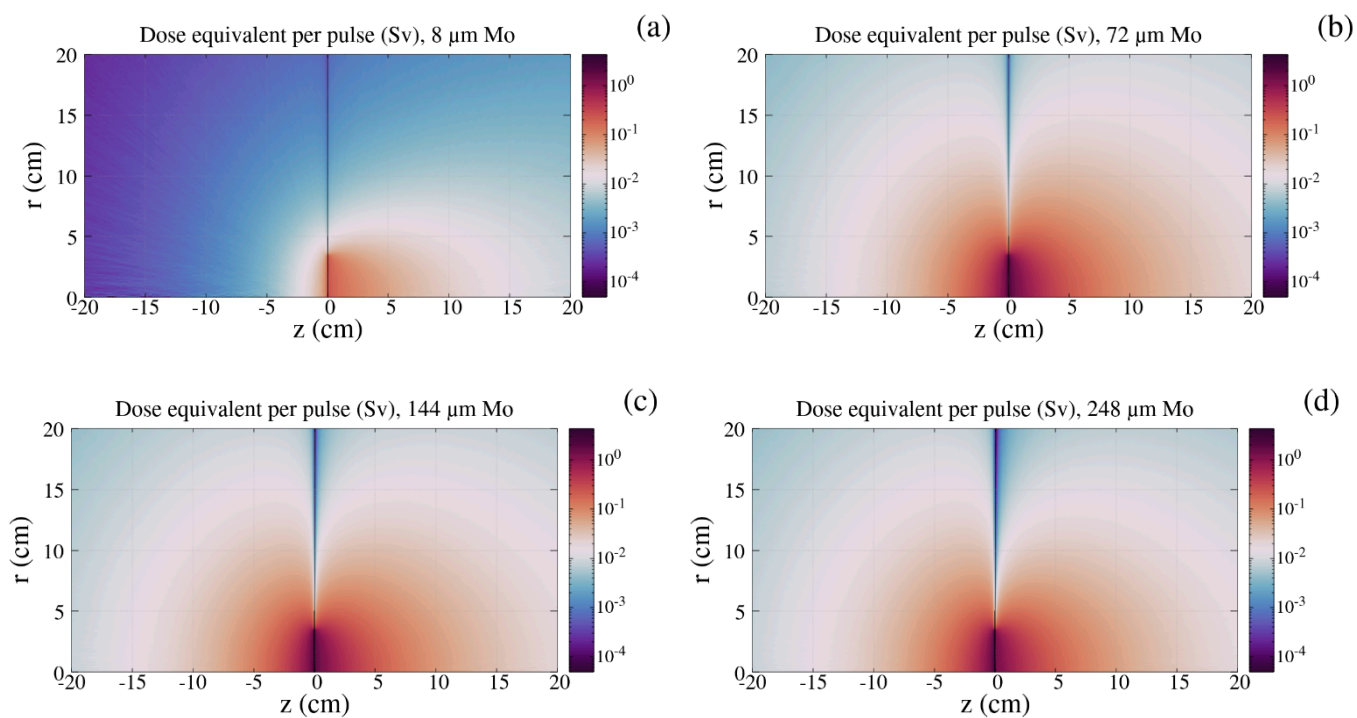

**Figure S2.** Spatial distribution of dose equivalent by per IPEB pulse on tungsten target with thicknesses of (a) 8  $\mu\text{m}$ , (b) 72  $\mu\text{m}$  (the optimal target thickness), (c) 144  $\mu\text{m}$  (2 times of the optimal target thickness), (d) 248  $\mu\text{m}$  (CSDA range).

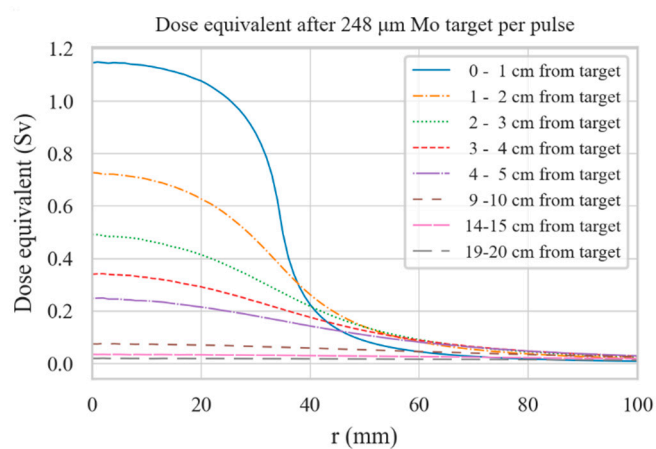

**Figure S3.** Dose equivalent distribution per IPEB pulse on molybdenum target with the thickness of CSDA range.

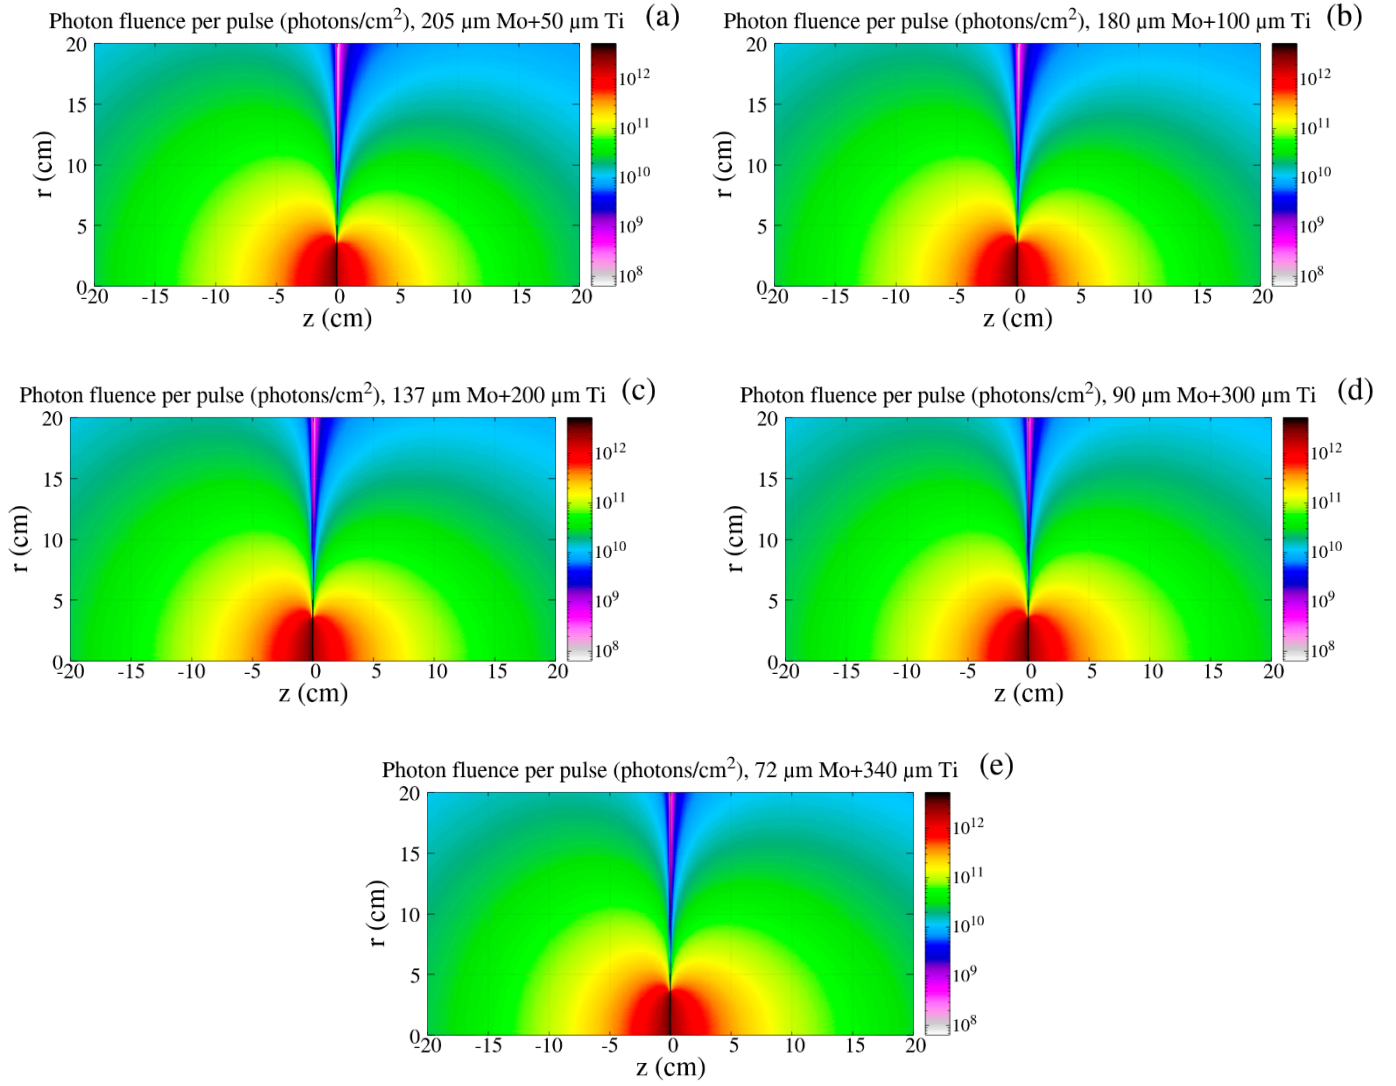

**Figure S4.** Spatial distribution of photon fluence by IPEB on molybdenum-titanium dual-layer target with thicknesses combination (subfigure a-e corresponding to the duplicate item titles in Table 2).

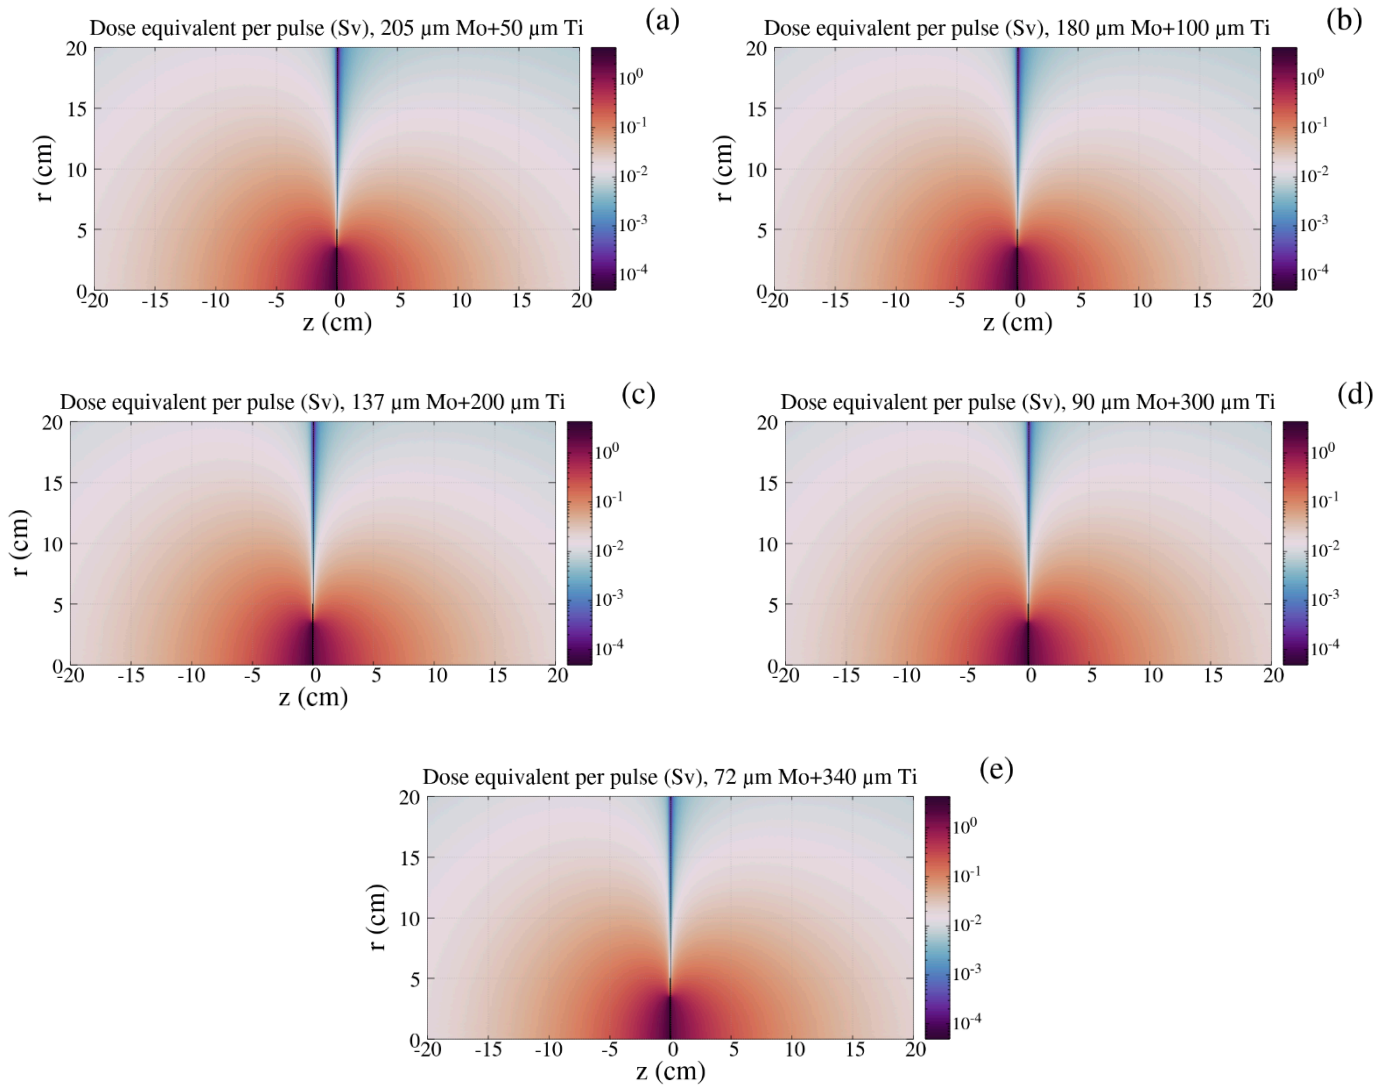

**Figure S5.** Spatial distribution of dose equivalent by IPEB on molybdenum-titanium dual-layer target with thicknesses combination (subfigure a-e corresponding to the duplicate item titles in Table 2).

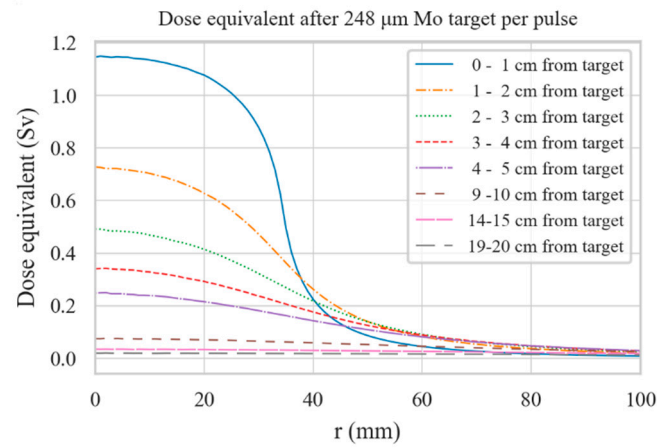

**Figure S6.** Dose equivalent distribution per IPEB pulse on dual-layer targets with parameters of Table 4e.

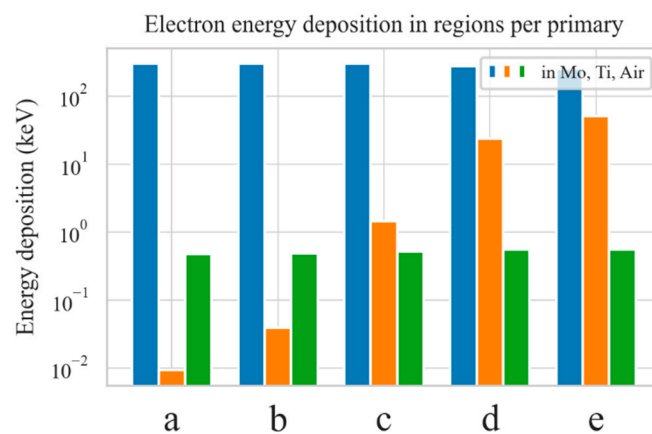

**Figure S7.** Electron energy deposition in different regions with parameters in Table 2.
