# Supplementary material for: Optimization of Transmission X-ray Target for Intense Pulsed Electron Beam Accelerators
Source: MDPI journal article supplement (doi:10.3390/app12094327), 2022-04-25
Supplement: s1 [file s1]

Archive with 1 entries (1 files):
- applsci-1634908-supplementary.pdf
